# Supplementary material for: Temperature-induced swelling and unwinding of double-stranded DNA
Source: Royal Society of Chemistry journal article supplement (doi:10.1039/d4cp04425h), 2025-01-01
Supplement: d4cp04425h1.pdf [file d4cp04425h1.pdf]

**Electronic Supplementary Information for**  
**“Temperature-induced twisting and swelling of**  
**double-stranded DNA”**

**Tingting Liu<sup>1</sup>, Kai Liu<sup>1</sup>, Xuankang Mou<sup>1</sup>, and Shibei Li<sup>\*,1</sup>**

<sup>1</sup> *Department of Physics, Wenzhou University, Wenzhou, Zhejiang 325035, China.*

\*Author to whom correspondence should be addressed.

Electronic addresses: shibenli@wzu.edu.cn (S. Li)

**This PDF file includes the parameters under various temperatures:**

1. Fig. S1-The root mean square deviation (RMSD) curves.
2. Fig. S2-Gaussian distributions for the H-rise, H-twist, and H-diameter.
3. Fig. S3-The temperature dependent Rise and Twist at various temperatures  $T$ .
4. Fig. S4-The temperature dependent H-rise, H-twist and H-diameter for individual bp.
5. Fig. S5-The coupling between H-twist and H-rise, H-twist and H-diameter, H-rise and H-diameter at various temperatures  $T$ .
6. Fig. S6- The two dihedral angles  $\chi$  and  $\delta$  at various temperatures  $T$ .
7. Fig. S7-The three-dimensional PMF with respect to H-rise, H-diameter, and H-twist.
8. Fig. S8-The Pearson correlation coefficients  $\rho_{XY}$ .
9. Fig. S9-The distributions of twist stiffness  $C^{ij}$  about the bp step at various temperatures  $T$ .
10. Fig. S10-The distributions of H-diameter stiffness  $K_{DD}^{ij}$  about the bp step at various temperatures  $T$ .
11. Fig. S11-The distributions of  $\sigma_T^{ij}\sigma_T^{ij}$  about the bp step at various temperatures  $T$ .
12. Fig. S12-The distributions of  $\rho_{DT}^{ij}/(1 - \rho_{DT}^{ij}\rho_{DT}^{ij})$  about the bp step at various temperatures  $T$ .
13. Fig. S13-The distributions of H-twist and H-diameter coupling  $k_{DT}^{ij}$  about the bp step at various temperatures  $T$ .

**Figure S1**

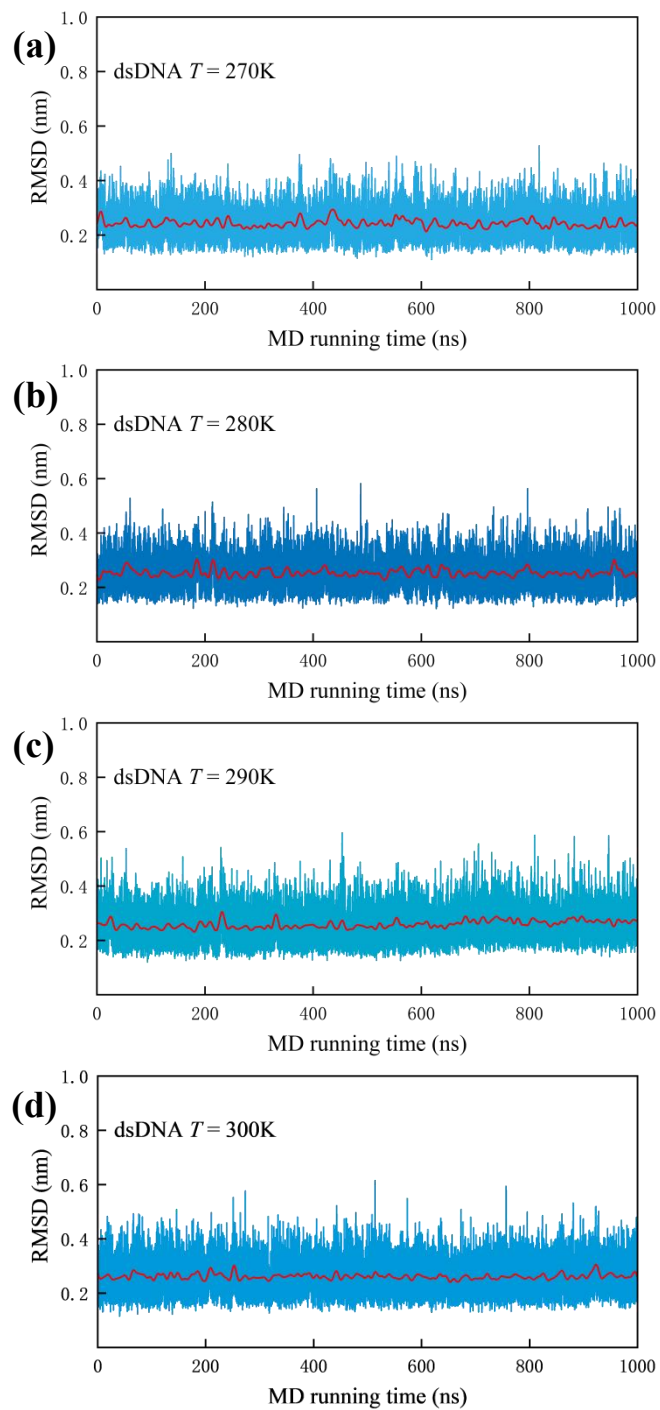

## Figure S1

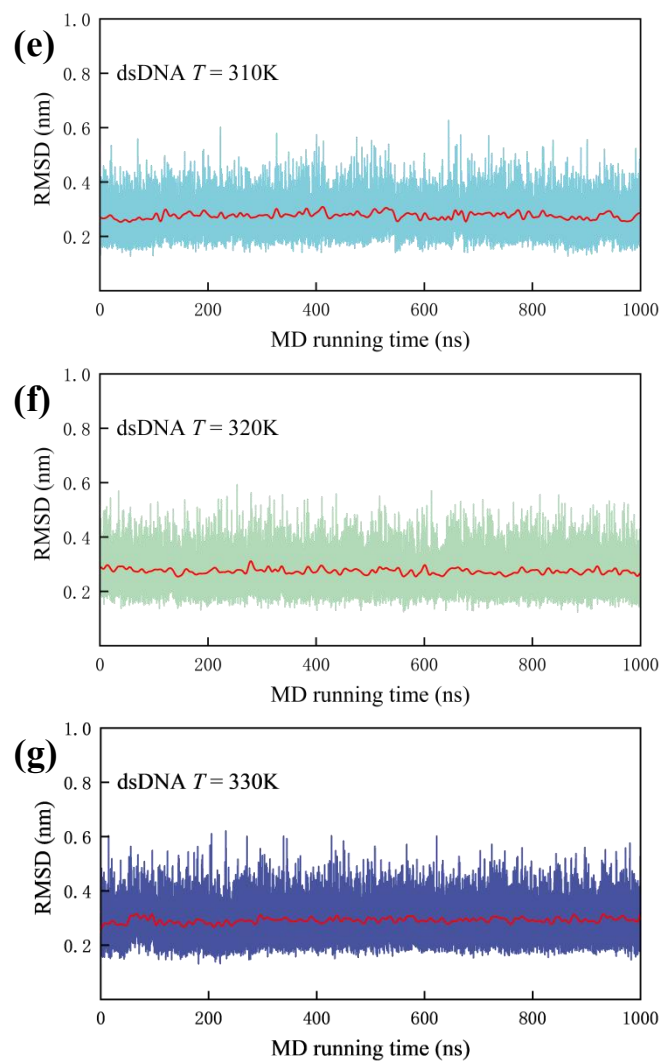

**Fig. S1**

The root mean square deviation (RMSD) curve of 14 base fragments in dsDNA center at various temperatures, where the red line represents the average of the relevant parameters every 5 ns. The temperature  $T$  varies from 270 K to 330 K, with a step of 10 K.

## Figure S2

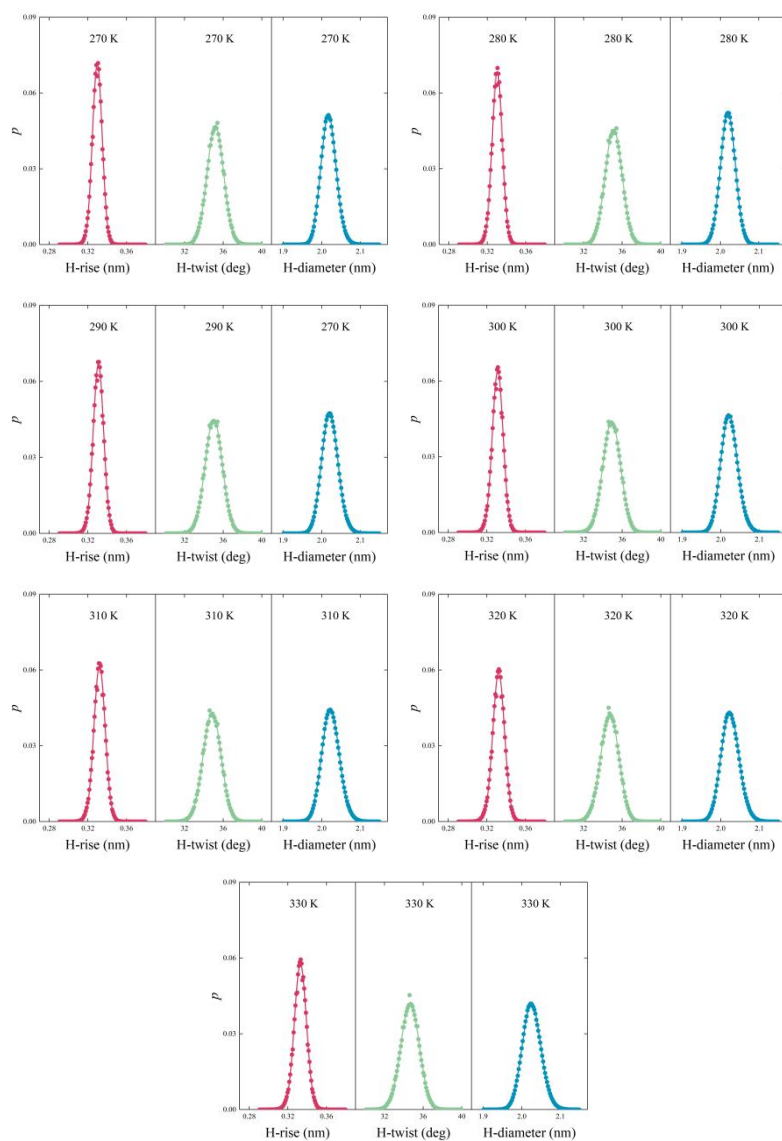

**Fig. S2**

The Gaussian distributions for H-rise, H-twist and H-diameter under various temperatures  $T$ , where the temperature varies from 270 K to 330 K, with a step of 10 K.

## Figure S3

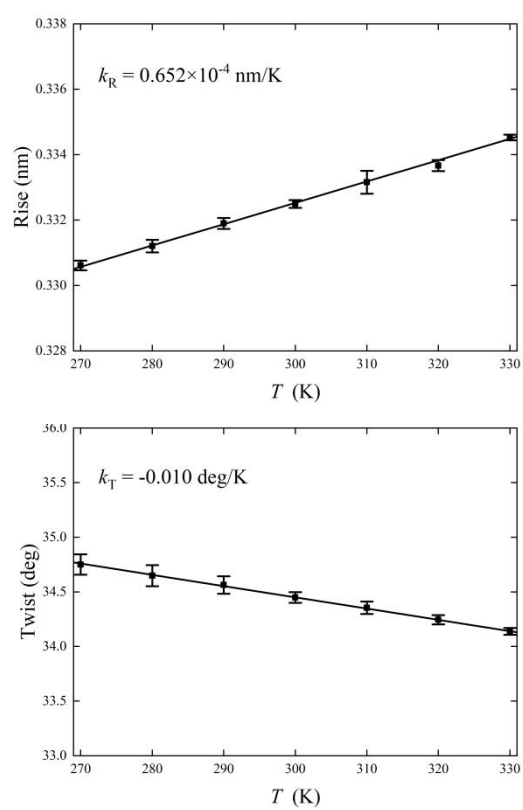

**Fig. S3**

The temperature dependent Rise and Twist. The temperature  $T$  varies from 270 K to 330 K, with a step of 10 K. The data points are mean values and standard deviations for the five measurement samples, while the solid lines are fitting results.

# Figure S4

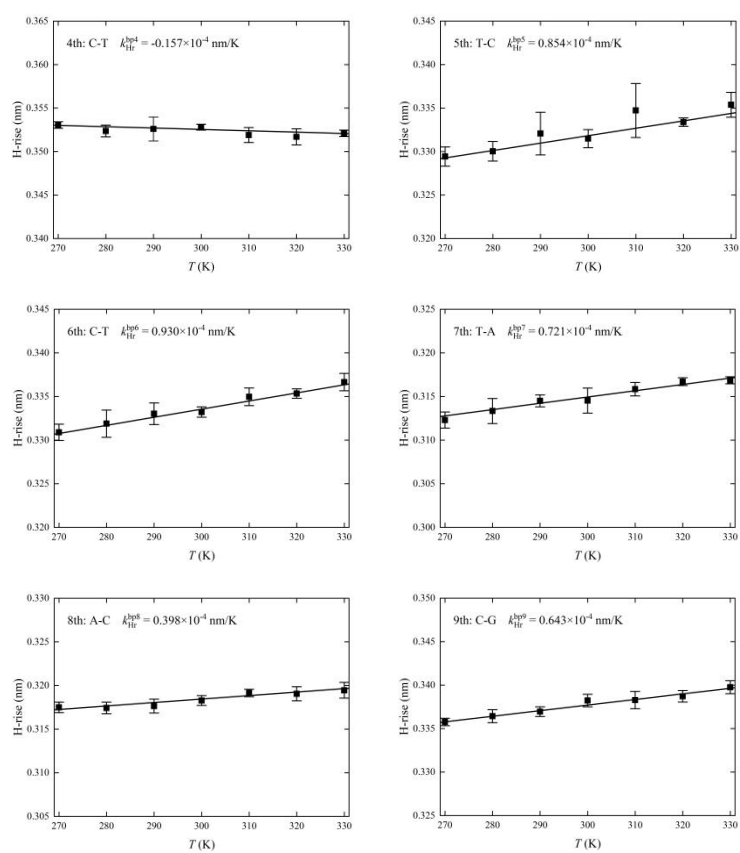

# Figure S4

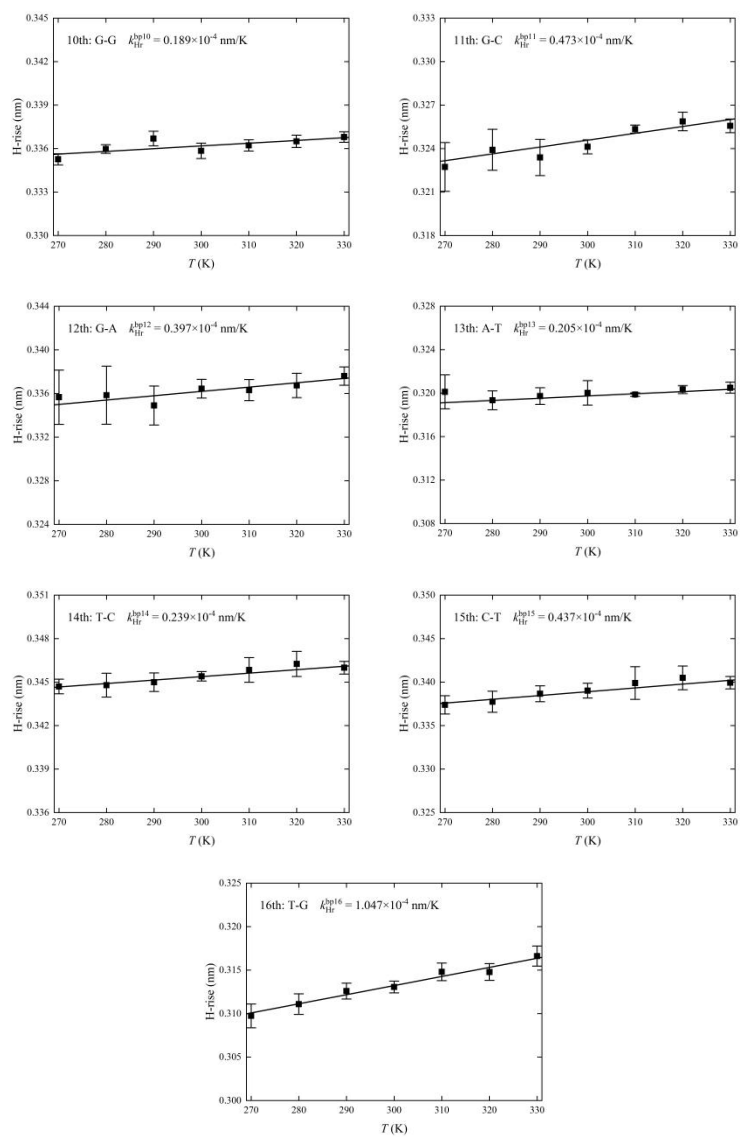

# Figure S4

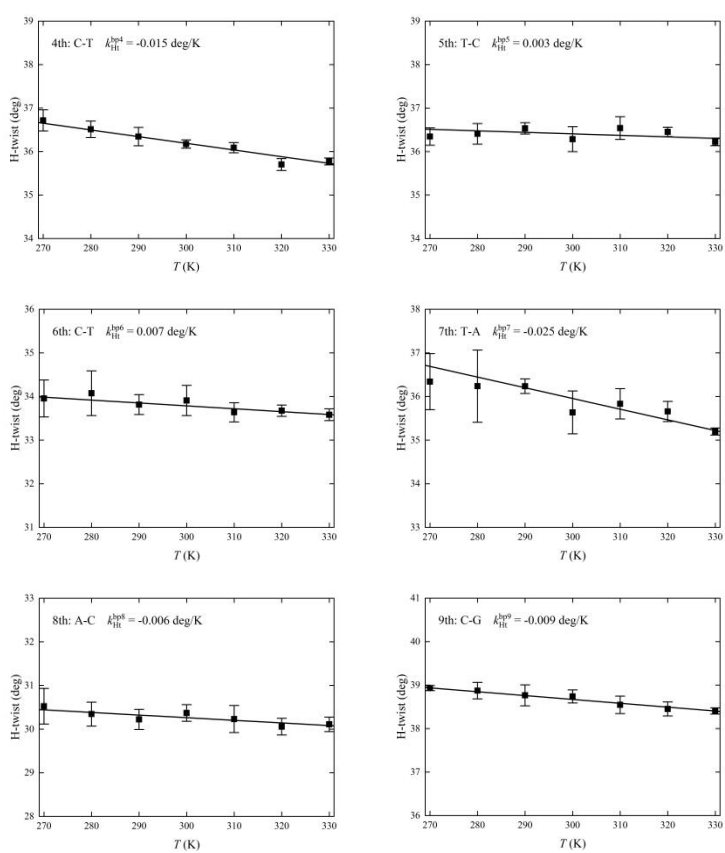



# Figure S4

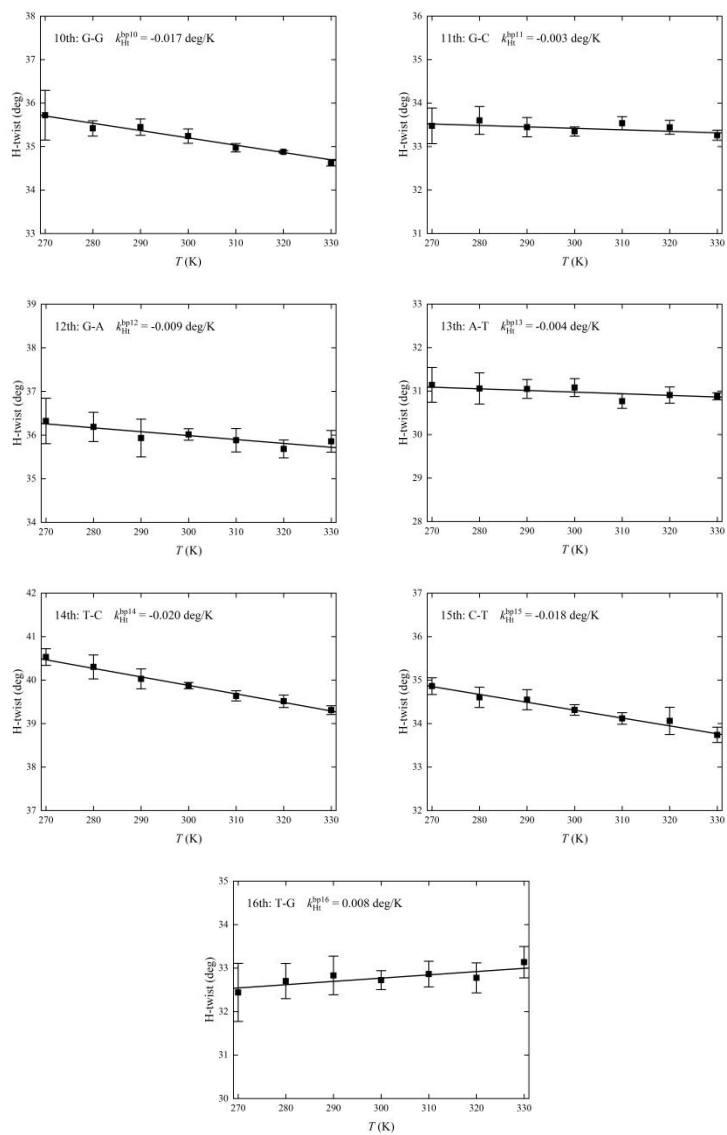

# Figure S4

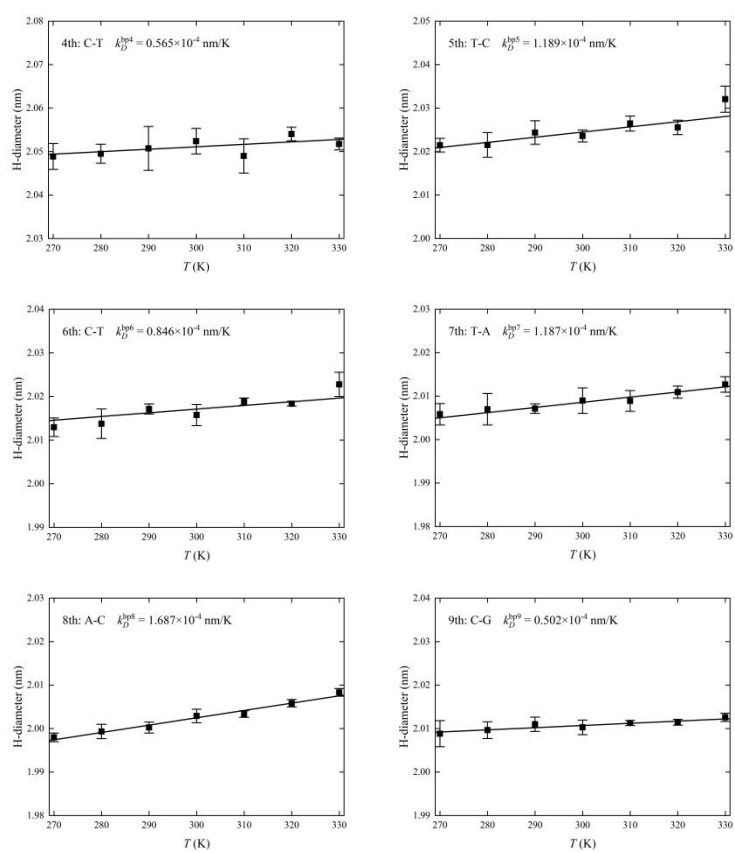

# Figure S4

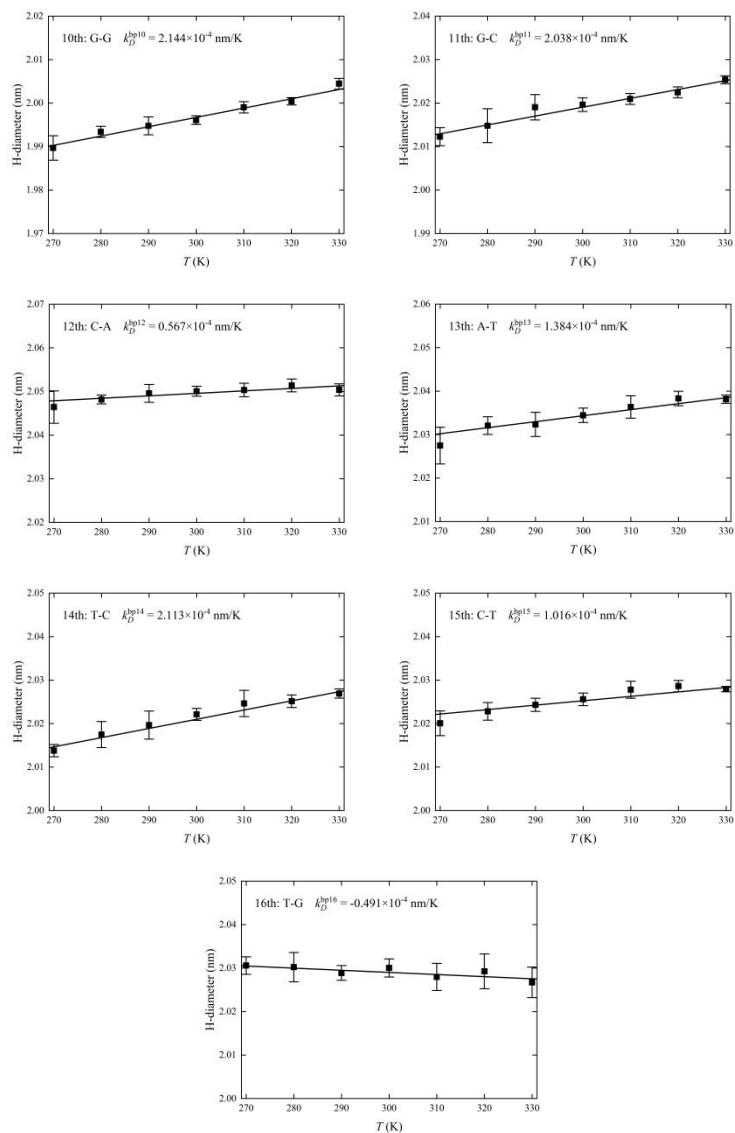

**Fig. S4**

The temperature dependent H-rise, H-twist and H-diameter for individual bp at various temperatures  $T$ . The temperature  $T$  varies from 270 K to 330 K, with a step of 10 K. The data points are mean values and standard deviations for the five measurement samples, while the solid lines are fitting results.

# Figure S5

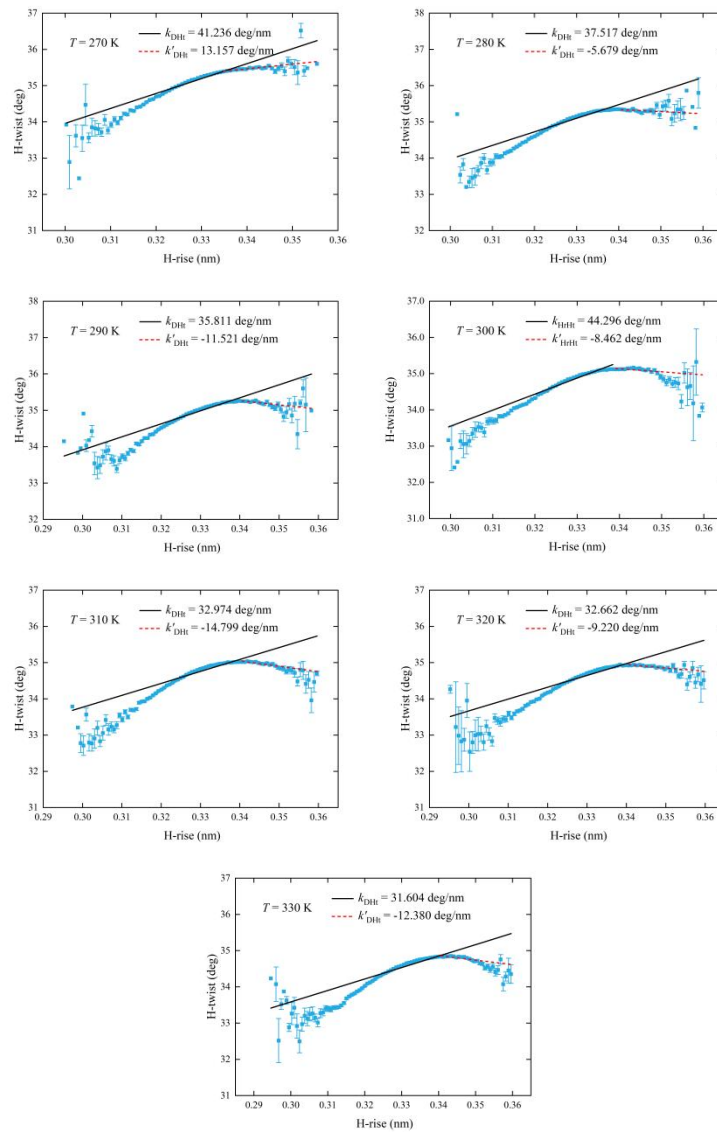

# Figure S5

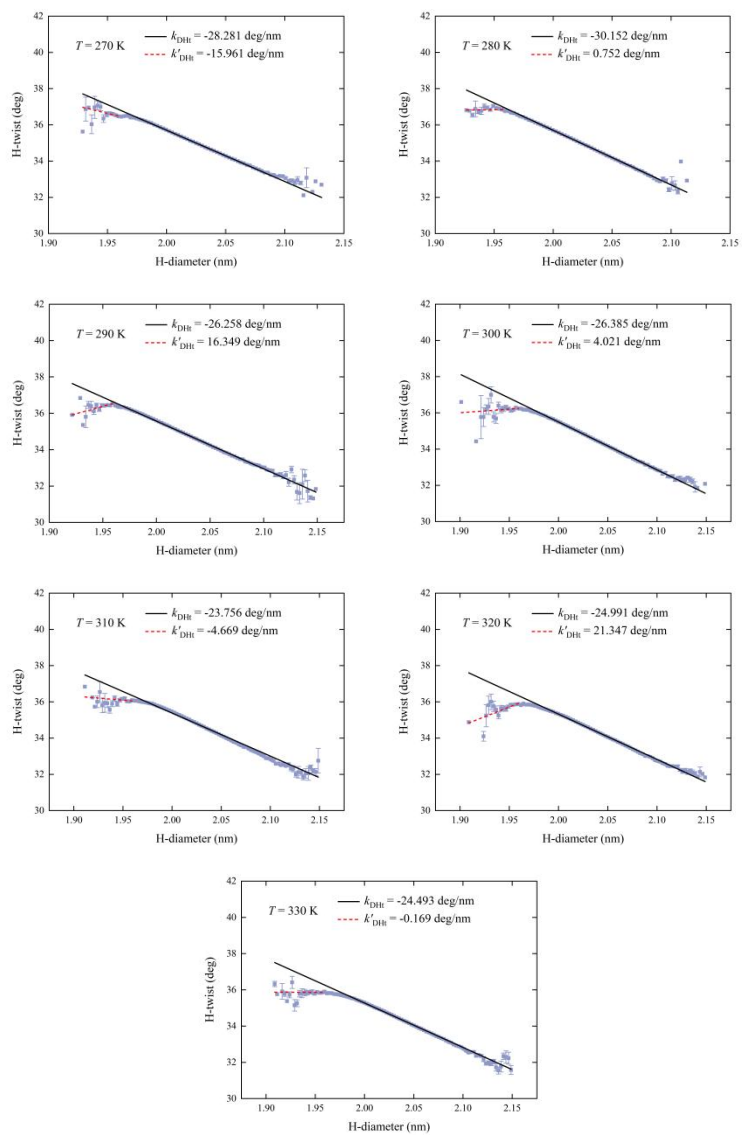

## Figure S5

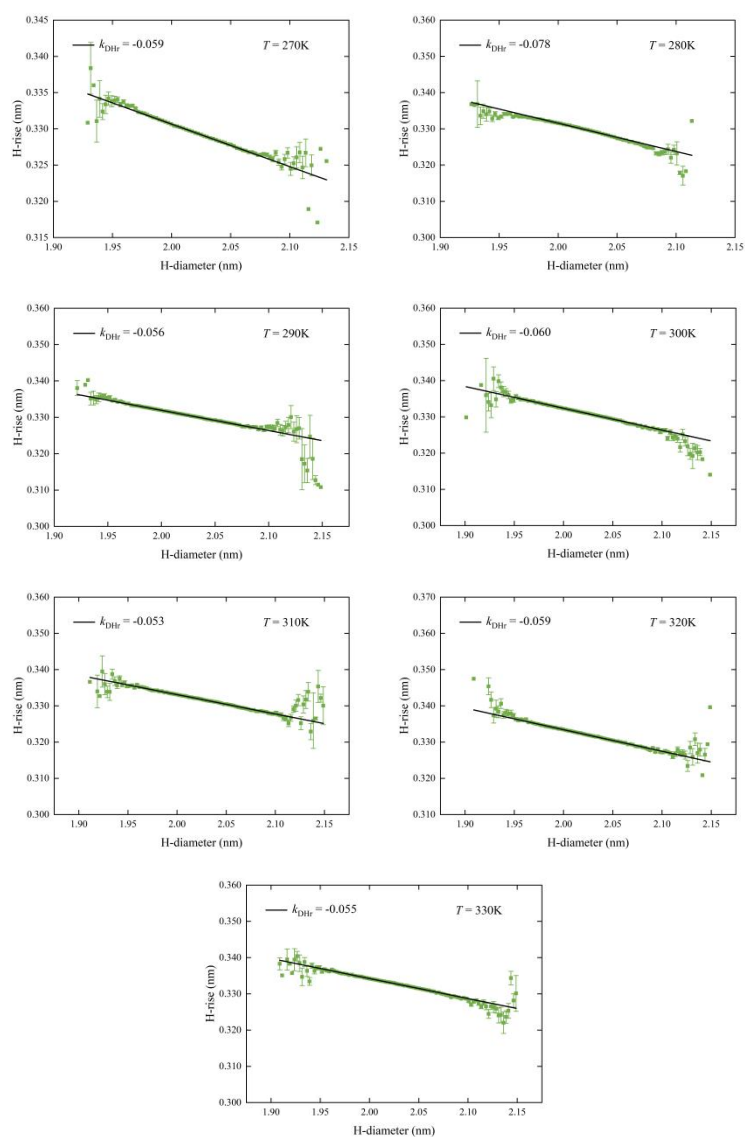

**Fig. S5**

The coupling between H-twist and H-rise, H-twist and H-diameter, H-rise and H-diameter at various temperatures  $T$ . The temperature  $T$  varies from 270 K to 330 K, with a step of 10 K. The data points are mean values and standard deviations, while the solid lines are fitting results.

# Figure S6

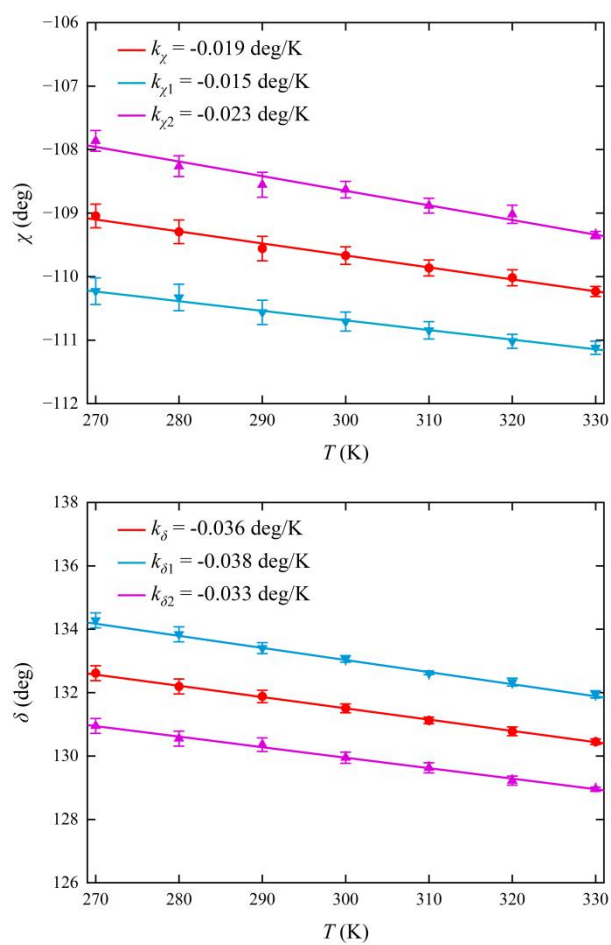

**Fig. S6**

The two dihedral angles  $\chi$  and  $\delta$  at various temperatures  $T$ . The temperature  $T$  varies from 270 K to 330 K, with a step of 10 K. The data points are mean values and standard deviations for the five measurement samples, while the solid lines are fitting results.

**Figure S7**

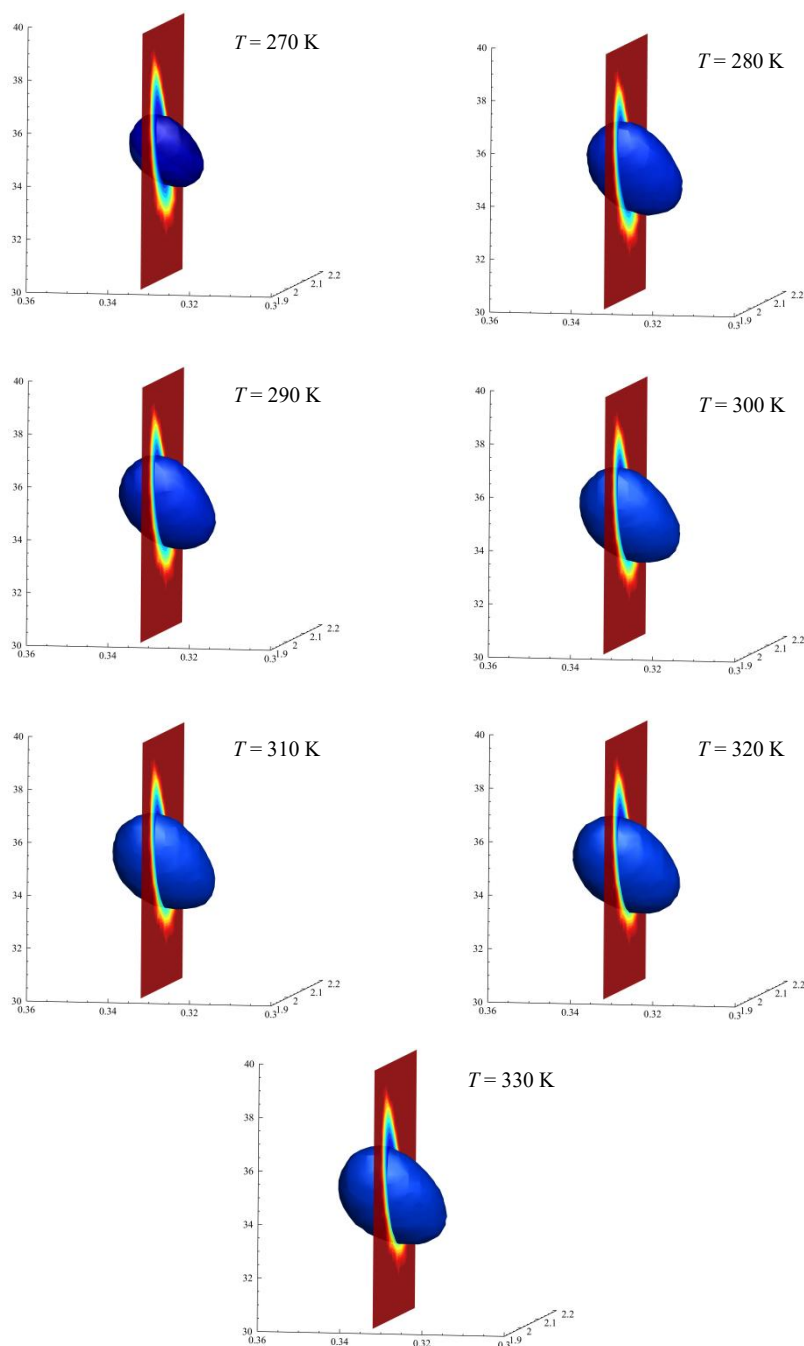

**Fig. S7**

The three-dimensional PMF with respect to H-rise, H-diameter, and H-twist at various temperature  $T$ . The temperature  $T$  varies from 270 K to 330 K, with a step of 10 K.



**Figure S8**

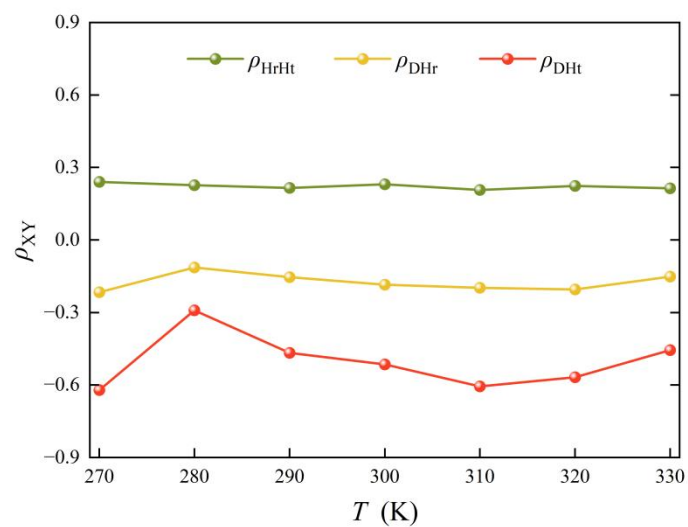

**Fig. S8**

The Pearson correlation coefficients  $\rho_{XY}$  among the H-rise Hr, H-twist Ht, and H-diameter  $D$  at various temperature  $T$ . The temperature  $T$  varies from 270 K to 330 K, with a step of 10 K.

# Figure S9

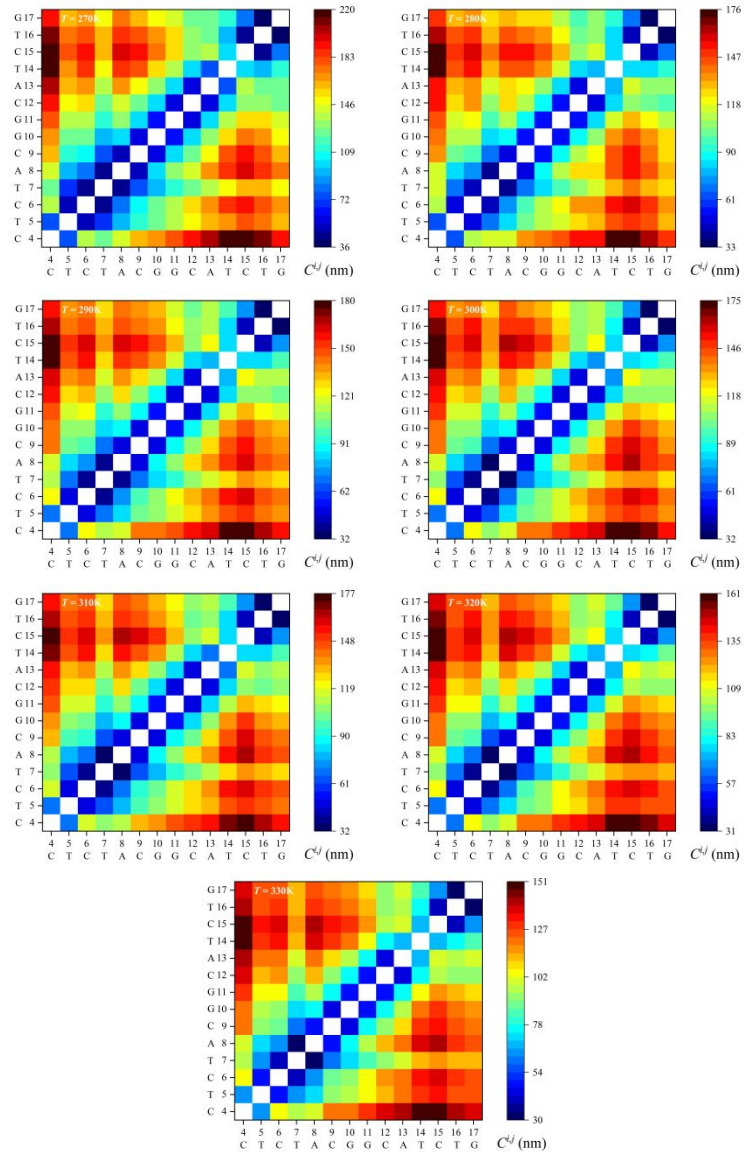

**Fig. S9**

The two-dimensional distributions of twist stiffness  $C^{ij}$  about the bp step at various temperature  $T$ . The temperature  $T$  varies from 270 K to 330 K, with a step of 10 K.

# Figure S10

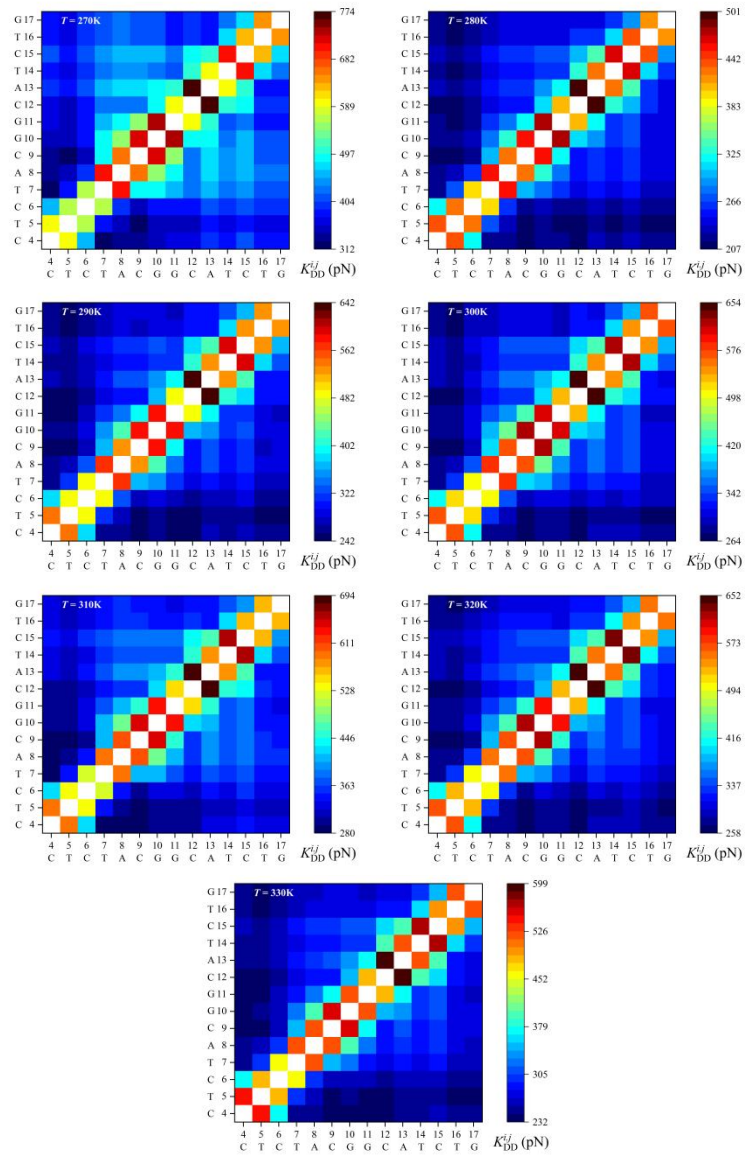

**Fig. S10**

The two-dimensional distributions of H-diameter stiffness  $K_{DD}^{ij}$  about the bp step at various temperature  $T$ . The temperature  $T$  varies from 270 K to 330 K, with a step of 10 K.

**Figure S11**

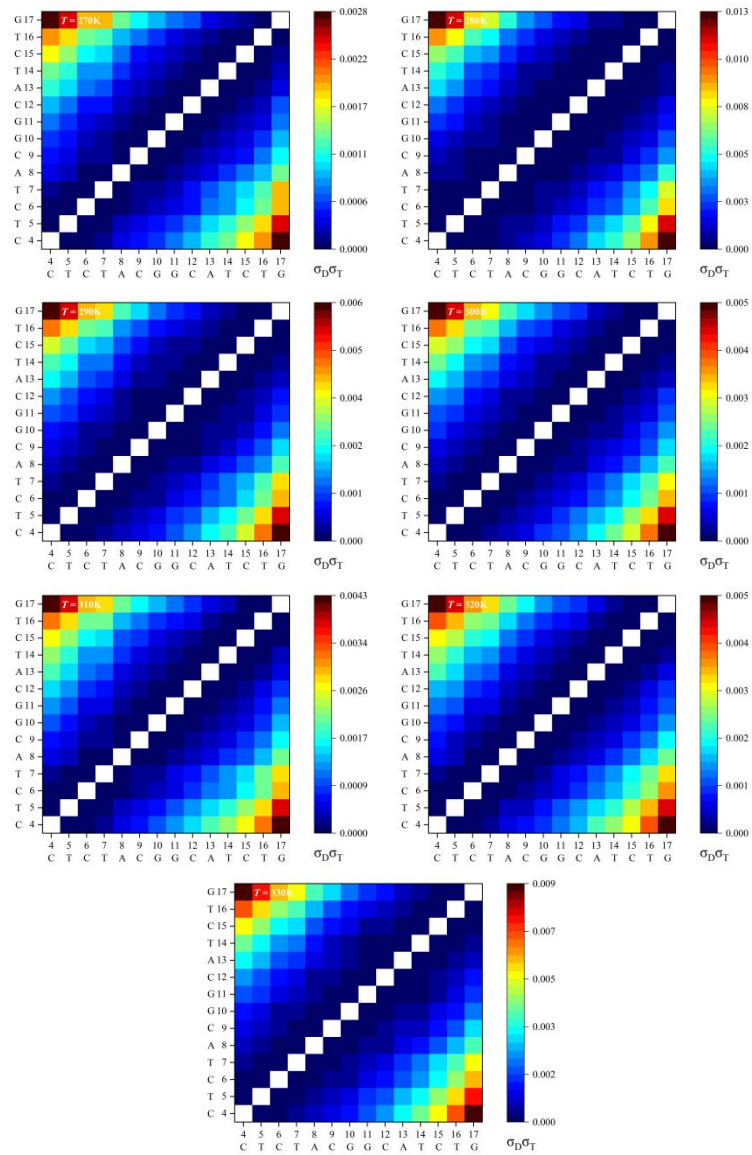

**Fig. S11**

The two-dimensional distributions of  $\sigma_T^{ij}\sigma_T^{ij}$  about the bp step at various temperature  $T$ . The temperature  $T$  varies from 270 K to 330 K , with a step of 10 K.

# Figure S12

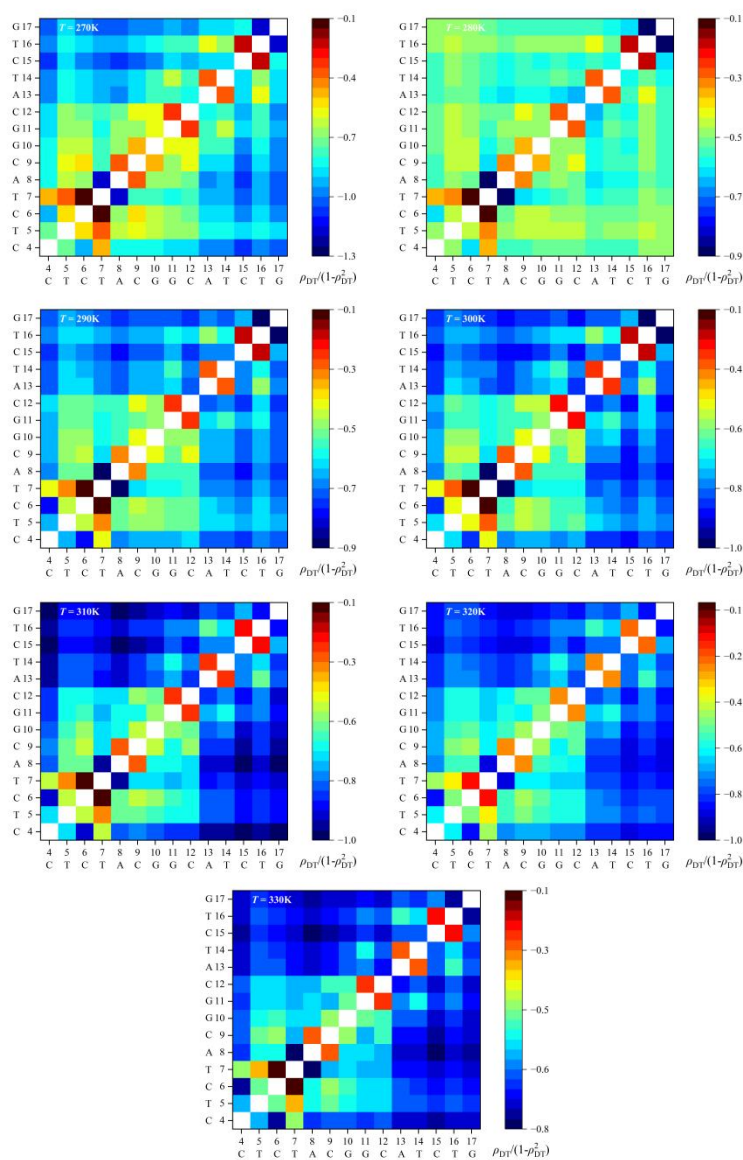

**Fig. S12**

The two-dimensional distributions of  $\rho_{DT}^{ij} / (1 - \rho_{DT}^{ij} \rho_{DT}^{ij})$  about the bp step at various temperature  $T$ . The temperature  $T$  varies from 270 K to 330 K, with a step of 10 K.

**Figure S13**

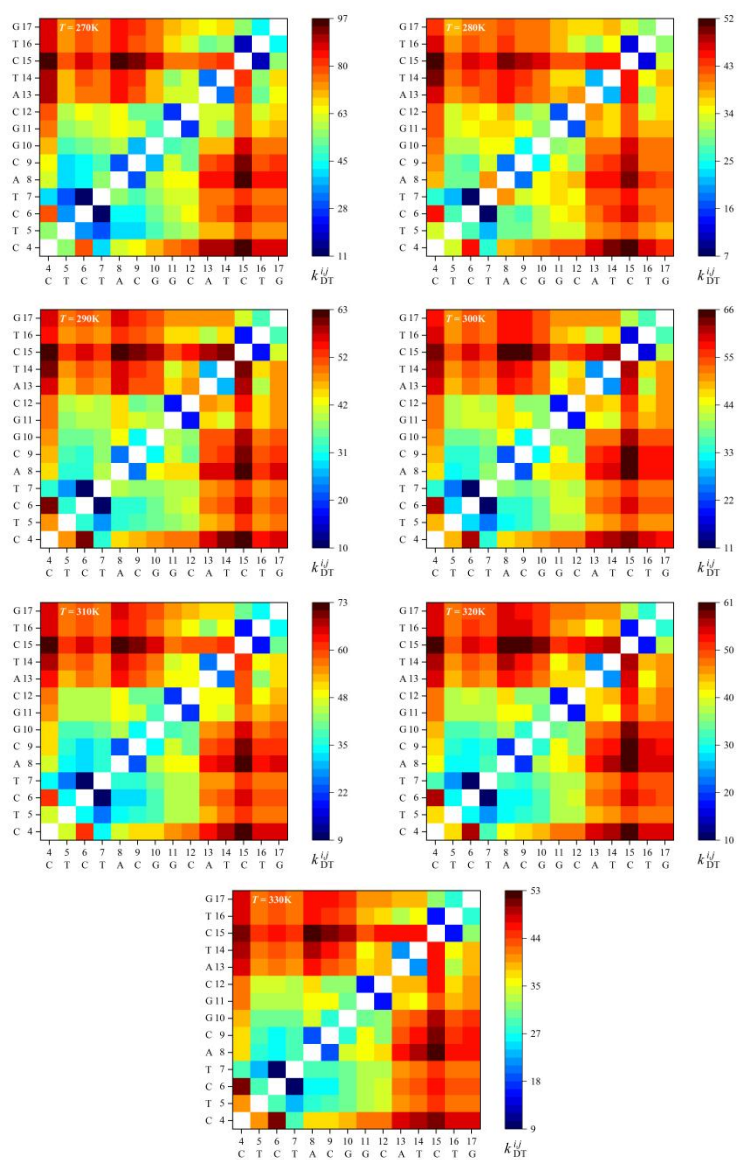

**Fig. S13**

The two-dimensional distributions of H-twist and H-diameter coupling  $k_{DT}^{ij}$  about the bp step at various temperature  $T$ . The temperature  $T$  varies from 270 K to 330 K, with a step of 10 K.
